# Supplementary material for: Atomically dispersed Au catalysts supported on CeO2 foam: controllable synthesis and CO oxidation reaction mechanism
Source: Royal Society of Chemistry journal article supplement (doi:10.1039/c7nr06665a), 2017-01-01
Supplement: c7nr06665a1.pdf [file c7nr06665a1.pdf]

## Supporting Information

### **Atomically dispersed Au catalysts supported on CeO<sub>2</sub> foam: controllable synthesis and CO oxidation reaction mechanism**

Hao Wang,<sup>a</sup> Jianhua Shen,<sup>a</sup> Jianfei Huang,<sup>b</sup> Tengjing Xu,<sup>a</sup> Jingrun Zhu,<sup>a</sup> Yihua Zhu<sup>a,\*</sup> and Chunzhong Li<sup>a,\*</sup>

<sup>a</sup>. Key Laboratory for Ultrafine Materials of Ministry of Education, School of Materials Science and Engineering, East China University of Science and Technology, Shanghai 200237, P. R. China

<sup>b</sup>. Department of Chemistry and Biochemistry, University of California, Santa Barbara, Santa Barbara 93106, California, United States

\*Corresponding author. E-mail: yhzhu@ecust.edu.cn (Prof. Y. H. Zhu) and czli@ecust.edu.cn (Prof. C. Z. Li).

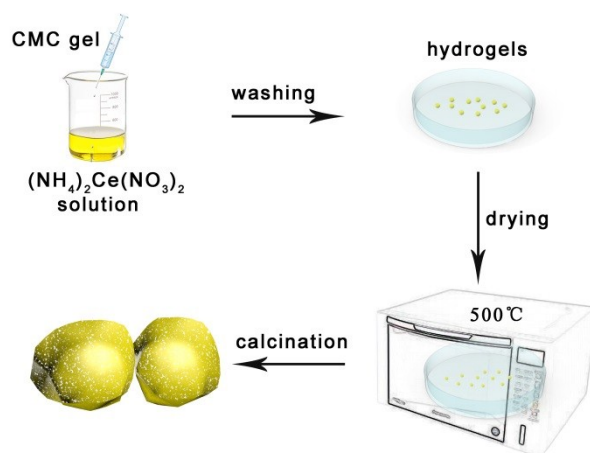

**Fig. S1** The schematic of preparing CeO<sub>2</sub> foam in this work.

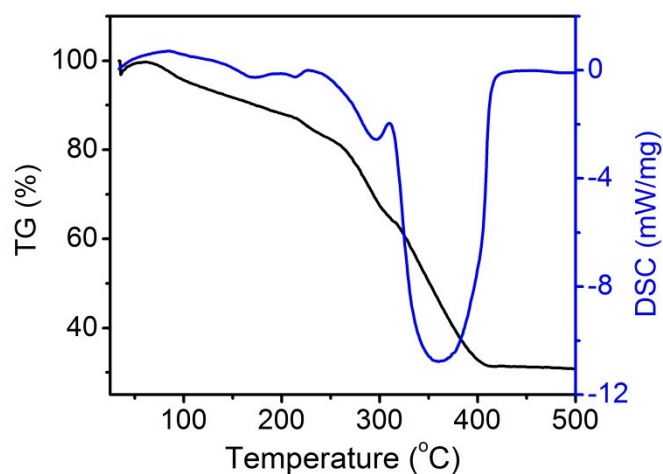

**Fig. S2** TG–DSC curve of the xerogels in this work.

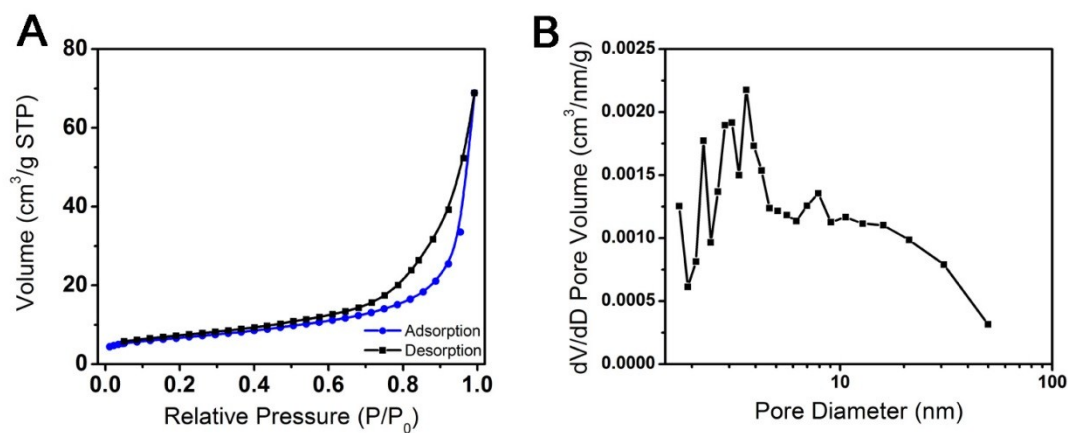

**Fig. S3** Nitrogen adsorption/desorption isotherm (A) and the corresponding pore size distribution (B) of the CeO<sub>2</sub> foams.

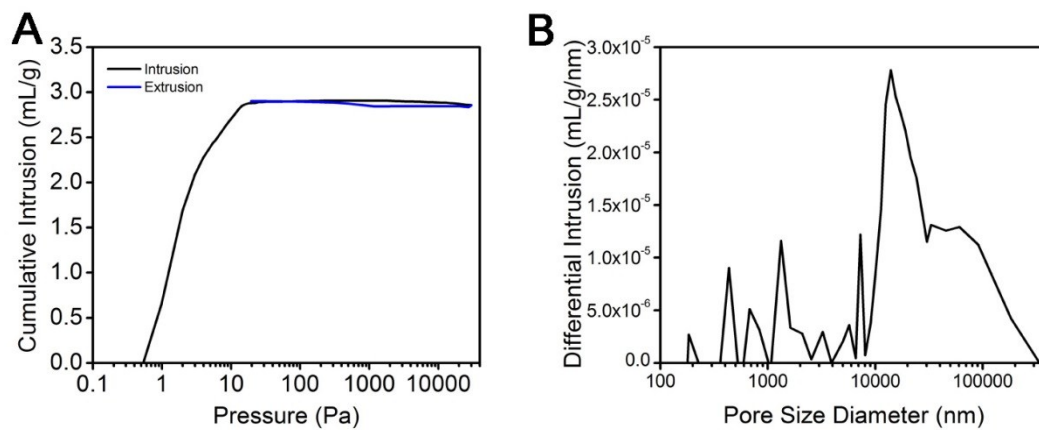

**Fig. S4** Mercury injection test (A) and the corresponding pore size distribution (B) of the CeO<sub>2</sub> foams.

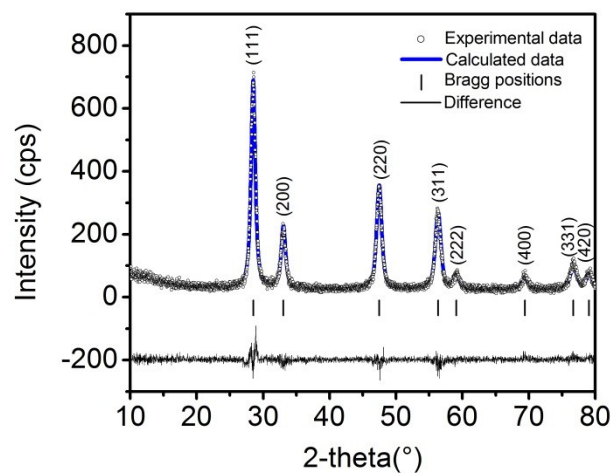

**Fig. S5** Rietveld analysis of XRD pattern: experimental data (cycle), final Rietveld refinement (blue line), Bragg positions (vertical line) and difference between both (black line)

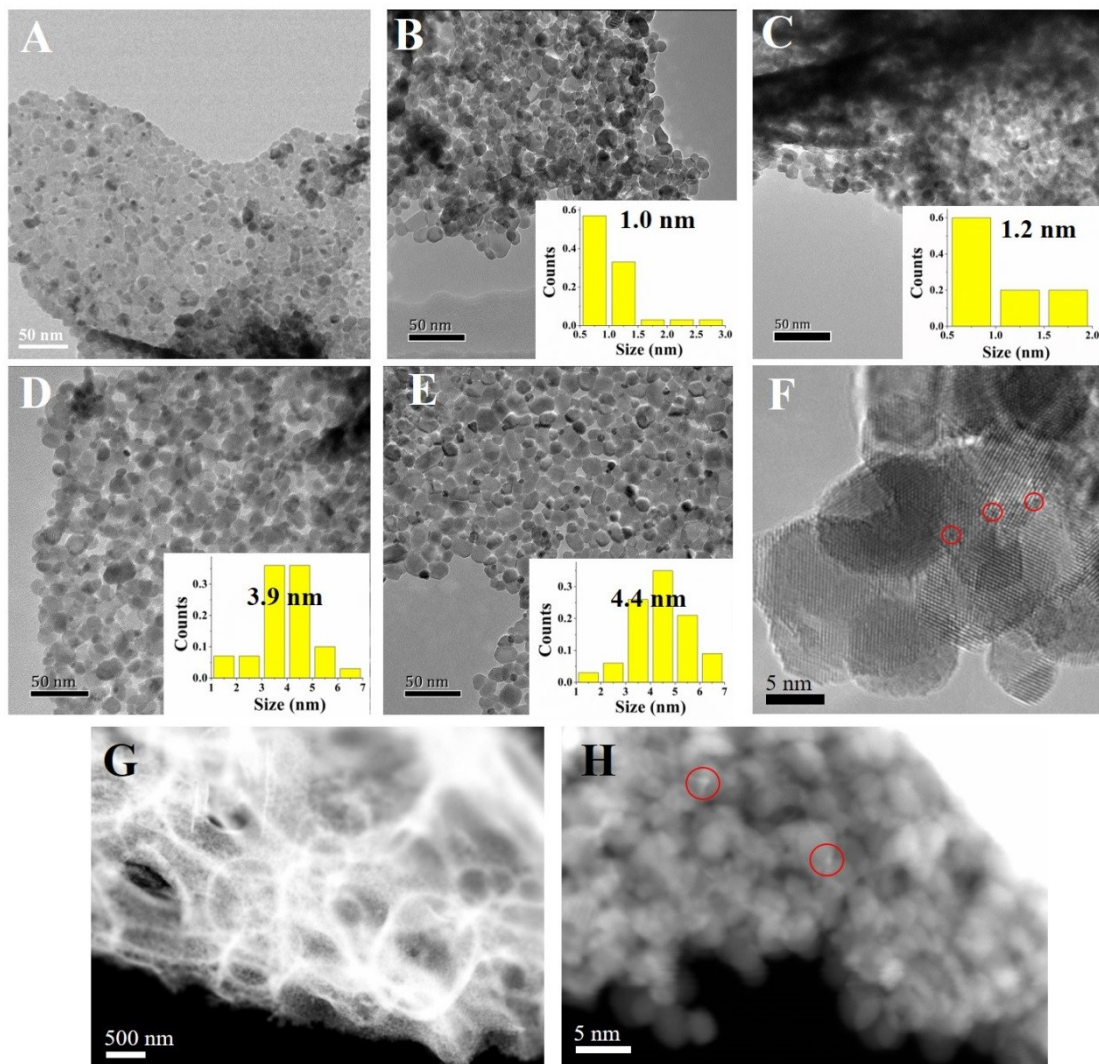

**Fig. S6** TEM images of Au/F-CeO<sub>2</sub> catalysts with different Au loading amounts: 0.12 wt % (A), 0.54 wt % (B), 1.1 wt % (C), 1.8 wt % (D) and 2.6 wt % (E); HRTEM image and HAADF-STEM images of the 0.12 wt % Au/F-CeO<sub>2</sub> catalyst (F-H).

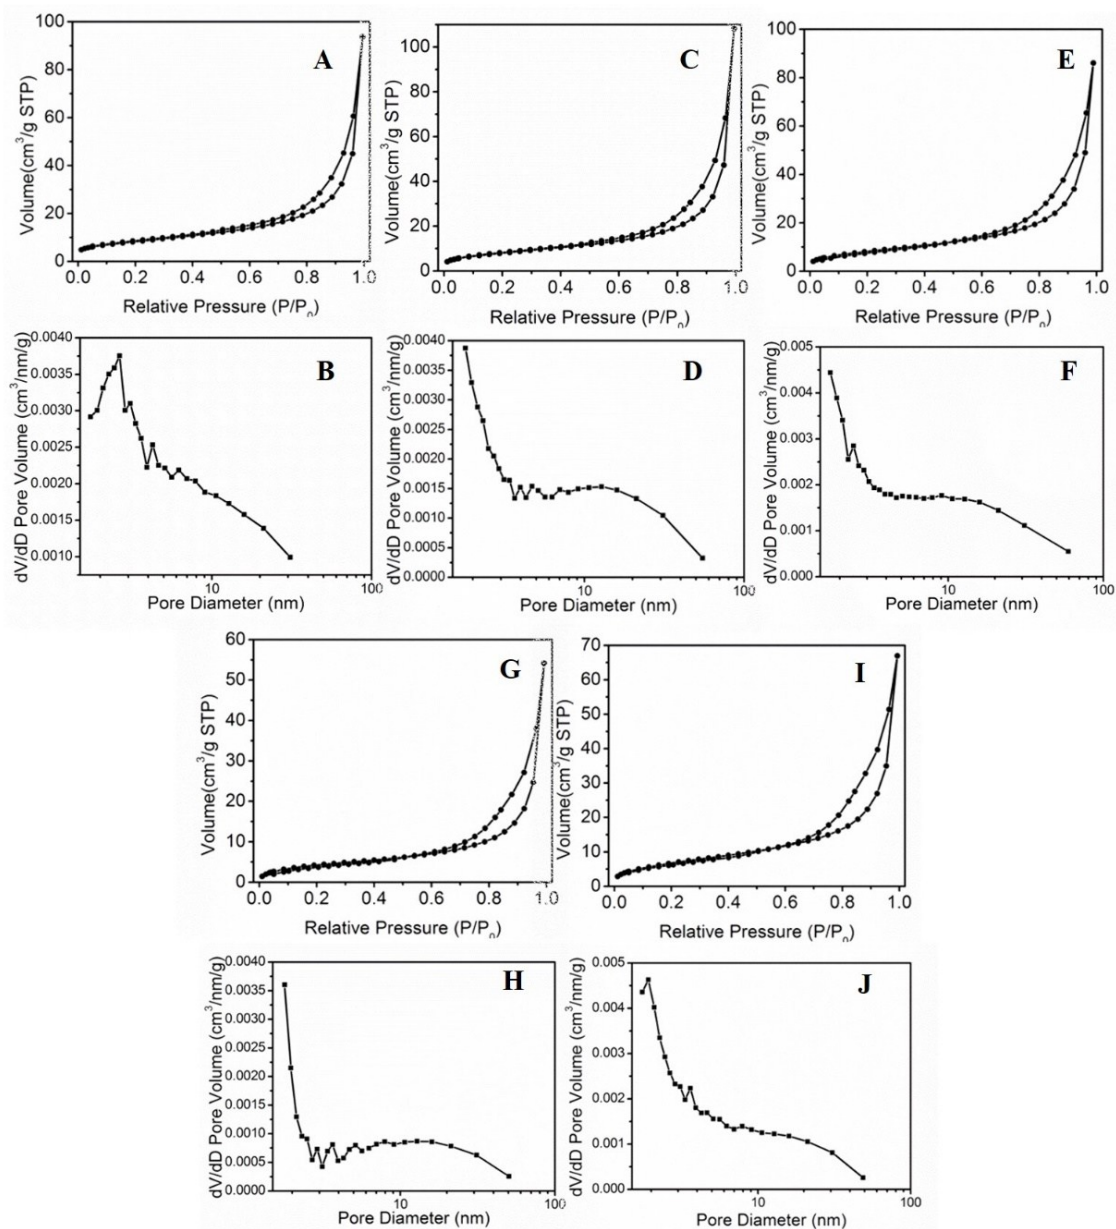

**Fig. S7** The  $N_2$  adsorption-desorption isotherms and corresponding pore size distribution of Au/F-CeO<sub>2</sub> catalysts with different Au loading amounts: 0.12 wt % (A, B), 0.54 wt % (C, D), 1.1 wt % (E, F), 1.8 wt % (G, H) and 2.6 wt % (I, J).

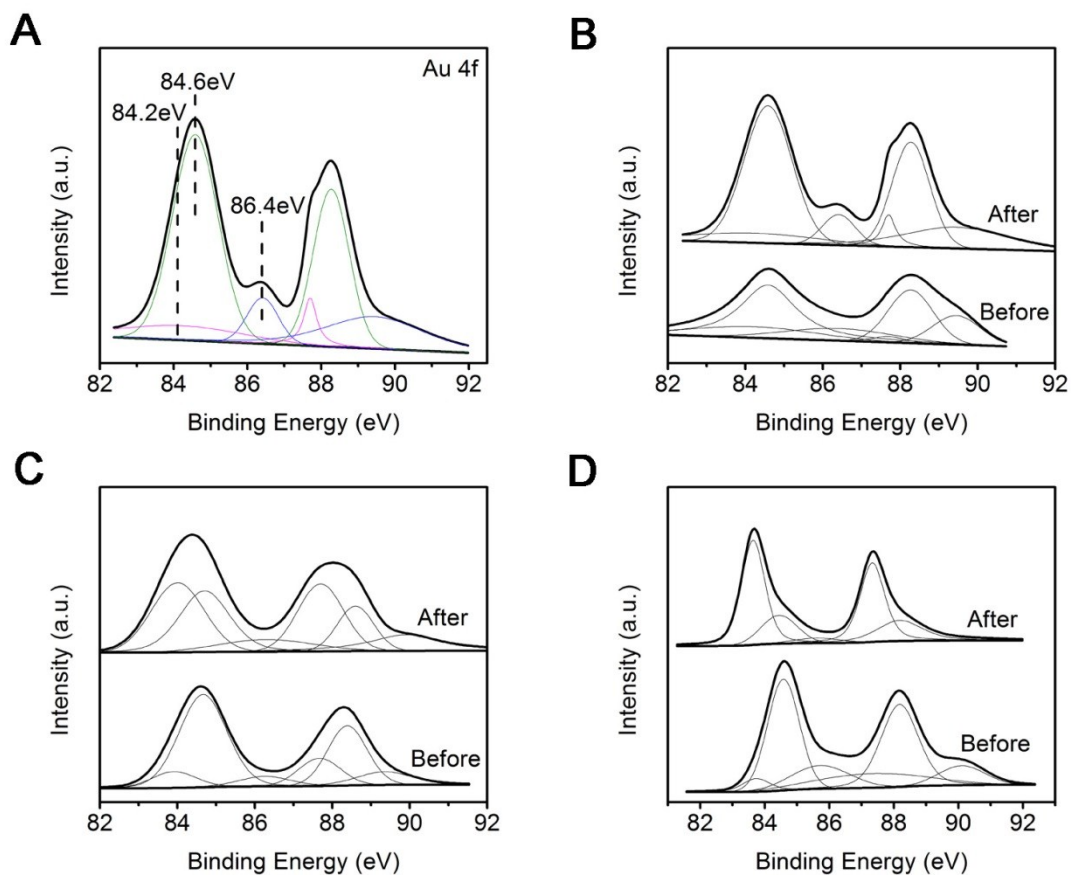

**Fig. S8** The detail Au 4f XPS spectrum of 0.12%Au/F-CeO<sub>2</sub> after calcination (A). The Au 4f XPS spectra of Au/F-CeO<sub>2</sub> catalysts before and after calcination with different Au loading amounts: 0.12 wt% (B), 1.1 wt% (C) and 2.6 wt% (D).

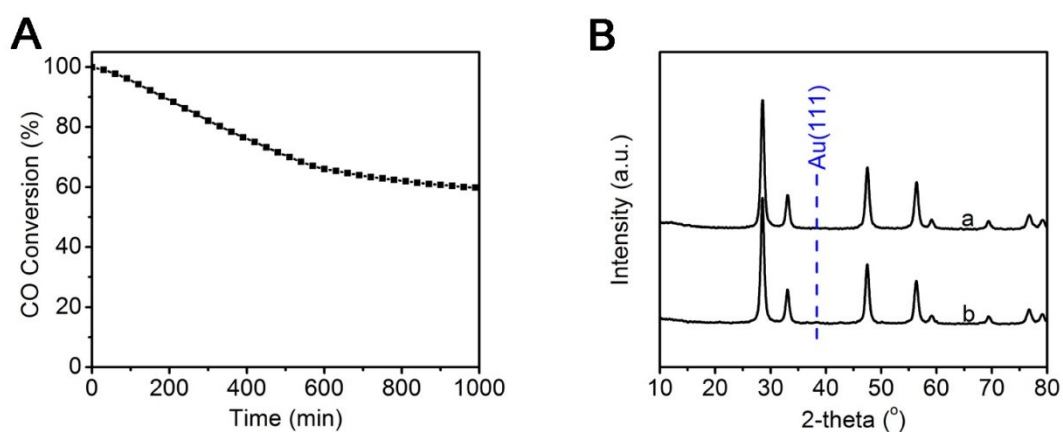

**Fig. S9** Long-term catalytic stability of 1.1%Au/F-CeO<sub>2</sub> catalyst at 30 °C (A) and corresponding XRD analysis before (a) and after (b) reaction (B).

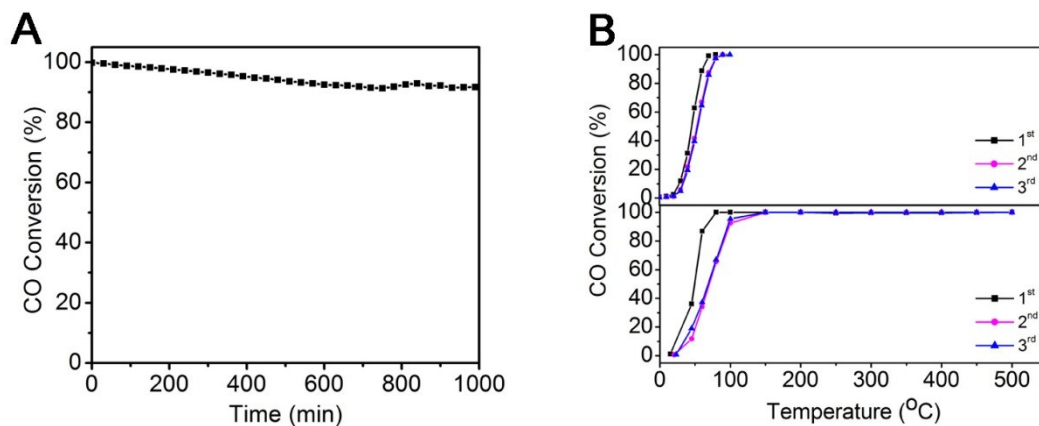

**Fig. S10** Long-term catalytic stability of 0.12%Au/F-CeO<sub>2</sub> catalyst under moisture condition at 80 °C (A) and repeating ignition-extinction cycles of CO conversion under moisture condition at different temperature (B).

**Tab. S1** Surface composition of the samples

| Sample                     | Ce                   |                      | O            |               | Au                  |                     |                      |
|----------------------------|----------------------|----------------------|--------------|---------------|---------------------|---------------------|----------------------|
|                            | Ce <sup>3+</sup> (%) | Ce <sup>4+</sup> (%) | Lattice O(%) | Adsorbed O(%) | Au <sup>0</sup> (%) | Au <sup>+</sup> (%) | Au <sup>3+</sup> (%) |
| CeO <sub>2</sub>           | 35.38                | 64.62                | 56.46        | 43.54         | *                   | *                   | *                    |
| 0.12%Au/F-CeO <sub>2</sub> | 34.45                | 65.55                | 76.15        | 23.85         | 11.83               | 65.47               | 22.70                |
| 0.54%Au/F-CeO <sub>2</sub> | 32.55                | 67.45                | 81.69        | 18.31         | 26.82               | 51.18               | 21.00                |
| 1.1%Au/F-CeO <sub>2</sub>  | 33.22                | 66.78                | 76.50        | 23.50         | 46.02               | 34.50               | 19.48                |
| 1.8%Au/F-CeO <sub>2</sub>  | 33.75                | 66.25                | 70.65        | 29.35         | 59.05               | 26.64               | 14.31                |
| 2.6%Au/F-CeO <sub>2</sub>  | 34.39                | 65.61                | 67.43        | 32.57         | 67.16               | 28.19               | 4.65                 |

**Tab. S2** The proportion of metallic Au before and after calcination.

| Sample                     | Before calcination | After calcination |
|----------------------------|--------------------|-------------------|
| 0.12%Au/F-CeO <sub>2</sub> | 15.01              | 11.83             |
| 1.1%Au/F-CeO <sub>2</sub>  | 18.44              | 46.02             |
| 2.6%Au/F-CeO <sub>2</sub>  | 17.93              | 67.16             |

**Tab. S3** The assignment of Ce 3d photoelectron peaks of the samples.

| Sample                     | Ce <sup>3+</sup> 3d <sub>5/2</sub> (eV) |        | Ce <sup>4+</sup> 3d <sub>5/2</sub> (eV) |        |        | Ce <sup>3+</sup> 3d <sub>3/2</sub> (eV) |        | Ce <sup>4+</sup> 3d <sub>3/2</sub> (eV) |        |        |
|----------------------------|-----------------------------------------|--------|-----------------------------------------|--------|--------|-----------------------------------------|--------|-----------------------------------------|--------|--------|
|                            | v <sub>0</sub>                          | v'     | v                                       | v''    | v'''   | v <sub>0</sub>                          | v'     | v'                                      | v''    | v'''   |
| CeO <sub>2</sub> foam      | 880.61                                  | 884.52 | 882.14                                  | 888.71 | 897.22 | 898.24                                  | 902.97 | 900.68                                  | 907.30 | 916.53 |
| 0.12%Au/F-CeO <sub>2</sub> | 880.38                                  | 884.53 | 882.22                                  | 888.75 | 897.05 | 898.33                                  | 903.16 | 900.78                                  | 907.32 | 916.65 |
| 0.54%Au/F-CeO <sub>2</sub> | 880.99                                  | 884.38 | 882.31                                  | 888.64 | 897.00 | 898.33                                  | 902.96 | 900.81                                  | 907.38 | 916.69 |
| 1.1%Au/F-CeO <sub>2</sub>  | 880.70                                  | 884.60 | 882.28                                  | 888.91 | 897.00 | 898.34                                  | 903.16 | 900.82                                  | 907.39 | 916.68 |
| 1.8%Au/F-CeO <sub>2</sub>  | 880.70                                  | 884.33 | 882.28                                  | 888.70 | 897.29 | 898.39                                  | 902.83 | 900.82                                  | 907.44 | 916.70 |
| 2.6%Au/F-CeO <sub>2</sub>  | 880.76                                  | 884.43 | 882.42                                  | 888.81 | 897.29 | 898.52                                  | 902.74 | 900.94                                  | 907.57 | 916.85 |

**Tab. S4** Specific rates and TOFs of the Au/F-CeO<sub>2</sub> catalysts in this work compared with some typical supported catalysts reported in literature.

| Catalysts                              | Au loading (wt%) | Temperature (°C) | Specific rate (mol <sub>CO</sub> h <sup>-1</sup> g <sub>Au</sub> <sup>-1</sup> ) | TOF (s <sup>-1</sup> ) |           |
|----------------------------------------|------------------|------------------|----------------------------------------------------------------------------------|------------------------|-----------|
| 1.1%Au/F-CeO <sub>2</sub>              | 1.1              | 80               | 2.97                                                                             | 1.1041 <sup>a</sup>    | this work |
| 0.12%Au/F-CeO <sub>2</sub>             | 0.12             | 80               | 26.12                                                                            | 1.4294 <sup>b</sup>    | this work |
| 2Au/CeO <sub>2</sub> -DP               | 2.0              | 80               | 10.2                                                                             | 1.9 <sup>c</sup>       | ref. 14   |
| 1Au/CeO <sub>2</sub> -RRCe             | 0.98             | 80               | 2.6                                                                              | 0.64 <sup>c</sup>      | ref. 14   |
| Au/CeO <sub>2</sub>                    | 3.0              | 80               | ≈4.5 <sup>d</sup>                                                                | *                      | ref. 43   |
| Au/CeO <sub>2</sub>                    | 1.0              | 100              | 1.6                                                                              | *                      | ref. 44   |
| Au/Fe <sub>2</sub> O <sub>3</sub> -WGC | 4.4              | 80               | 0.8                                                                              | 0.17                   | ref. 45   |

<sup>a</sup>Calculated with 14.7307% dispersion. <sup>b</sup>Calculated with 100% dispersion. <sup>c</sup>Dispersion was calculated based on the relation of  $D=1/d_{Au}$ . <sup>d</sup>Calculated by extrapolating the rate at 50 °C based on their activation energy.
